# Supplementary material
Source: publisher site journal article supplement (https://www.dovepress.com/article/458860)
Supplement: Supplementary file 1 [file get_supplementary_file.php]

**Table S1** Univariate logistic regression analysis for genes in P53 pathway

| Gene | P.Value | OR |
| --- | --- | --- |
| | DDIT3 | | --- | | TOB1 | | TPRKB | | FBXW7 | | HBEGF | | EI24 | | SDC1 | | INHBB | | CDK5R1 | | JUN | | PCNA | | TRAFD1 | | RGS16 | | SP1 | | TCHH | | PERP | | PLK3 | | SLC7A11 | | WWP1 | | BLCAP | | PITPNC1 | | RCHY1 | | CD82 | | EPHA2 | | CTSF | | GPX2 | | CCND3 | | FOS | | ANKRA2 | | GLS2 | | TPD52L1 | | MAPKAPK3 | | CDH13 | | PHLDA3 | | ERCC5 | | MXD4 | | GADD45A | | IFI30 | | GM2A | | DDB2 | | CCNK | | | 0.021564 | | --- | | 0.049257 | | 0.049405 | | 0.05863 | | 0.120965 | | 0.1218 | | 0.133481 | | 0.139915 | | 0.160208 | | 0.176206 | | 0.180866 | | 0.194946 | | 0.204943 | | 0.20526 | | 0.214351 | | 0.214905 | | 0.266514 | | 0.26711 | | 0.273151 | | 0.289603 | | 0.290066 | | 0.290562 | | 0.291894 | | 0.293084 | | 0.302815 | | 0.313038 | | 0.314121 | | 0.317741 | | 0.318424 | | 0.334406 | | 0.350253 | | 0.355712 | | 0.356771 | | 0.36641 | | 0.369661 | | 0.370387 | | 0.401451 | | 0.403281 | | 0.403944 | | 0.424672 | | 0.434927 | | | 0.40288 | | --- | | 1.84053 | | 0.302774 | | 0.3517 | | 2.468114 | | 0.549066 | | 2.364183 | | 8.195274 | | 6.042605 | | 0.821637 | | 1.425306 | | 1.557252 | | 0.677466 | | 0.586043 | | 0.102958 | | 1.490913 | | 0.802958 | | 18.81002 | | 0.62798 | | 0.638767 | | 0.51599 | | 1.463299 | | 0.564495 | | 0.626176 | | 1.756779 | | 0.663435 | | 0.76447 | | 0.890622 | | 0.610887 | | 0.438852 | | 1.399227 | | 2.014187 | | 0.519918 | | 2.195699 | | 0.685284 | | 3.183888 | | 1.414524 | | 0.763394 | | 0.475422 | | 0.580586 | | 0.659638 | |
| TAP1 | 0.440966 | 0.801248 |
| Gene | **P.Value** | **OR** |
| CDKN1A  SAT1  NOTCH1  ZNF365  SEC61A1  RXRA  SERTAD3  RPS27L  HRAS  TXNIP  BTG1  JAG2  APP  RPS12  PTPRE  TGFA  FAS  IER5  RRAD  RNF19B  PRMT2  RPL18  TP63  HINT1  RAB40C  ZFP36L1  F2R  HEXIM1  ITGB4  STEAP3  CDKN2AIP  VDR  STOM  TAX1BP3  UPP1  OSGIN1  CYFIP2  RETSAT  KIF13B  S100A4  HSPA4L  MXD1 | 0.451314  0.470248  0.478001  0.484122  0.493766  0.497114  0.520266  0.521644  0.521776  0.527365  0.544681  0.558957  0.568988  0.580139  0.596552  0.611439  0.61969  0.643944  0.647107  0.661156  0.665212  0.66949  0.680682  0.696774  0.730101  0.738574  0.764619  0.765539  0.767143  0.768409  0.769587  0.795119  0.798644  0.805364  0.821581  0.829045  0.853125  0.863638  0.877703  0.884147  0.889  0.896309 | | 0.80758 | | --- | | 1.360559 | | 0.629635 | | 0.15853 | | 1.318931 | | 0.587391 | | 0.820967 | | 1.305161 | | 0.703162 | | 1.146912 | | 0.890429 | | 1.764008 | | 0.778284 | | 0.831408 | | 0.810142 | | 0.727513 | | 1.498495 | | 1.113276 | | 0.787176 | | 1.579217 | | 0.772606 | | 0.909652 | | 0.866222 | | 0.860579 | | 0.865226 | | 1.289056 | | 0.644576 | | 1.230411 | | 0.909677 | | 0.815373 | | 1.658793 | | 0.874266 | | 1.071964 | | 0.874392 | | 1.073554 | | 0.692889 | | 1.056163 | | 1.13337 | | 1.062392 | | 0.91114 | | 0.862166 | | 1.06409 | |
| TM7SF3 | 0.899937 | 1.096469 |
| Gene | **P.Value** | **OR** |
| CGRRF1   | RAP2B | | --- | | DNTTIP2 | | SLC3A2 | | AK1 | | TRAF4 | | S100A10 | | BAIAP2 | | TP53 | | 0.901436   | 0.912854 | | --- | | 0.923043 | | 0.934598 | | 0.938586 | | 0.971807 | | 0.973345 | | 0.974319 | | 0.999314 | | 1.169499   | 1.019866 | | --- | | 0.953917 | | 1.029248 | | 0.856912 | | 0.979532 | | 0.989073 | | 0.959879 | | 1.000235 | |
| CCNG1 | 0.999553 | 1.00023 |
